# Supplementary material
Source: publisher figshare collection journal article supplement (https://frontiersin.figshare.com/ndownloader/files/17935991)
Supplement: Supplementary file [file 17935991]

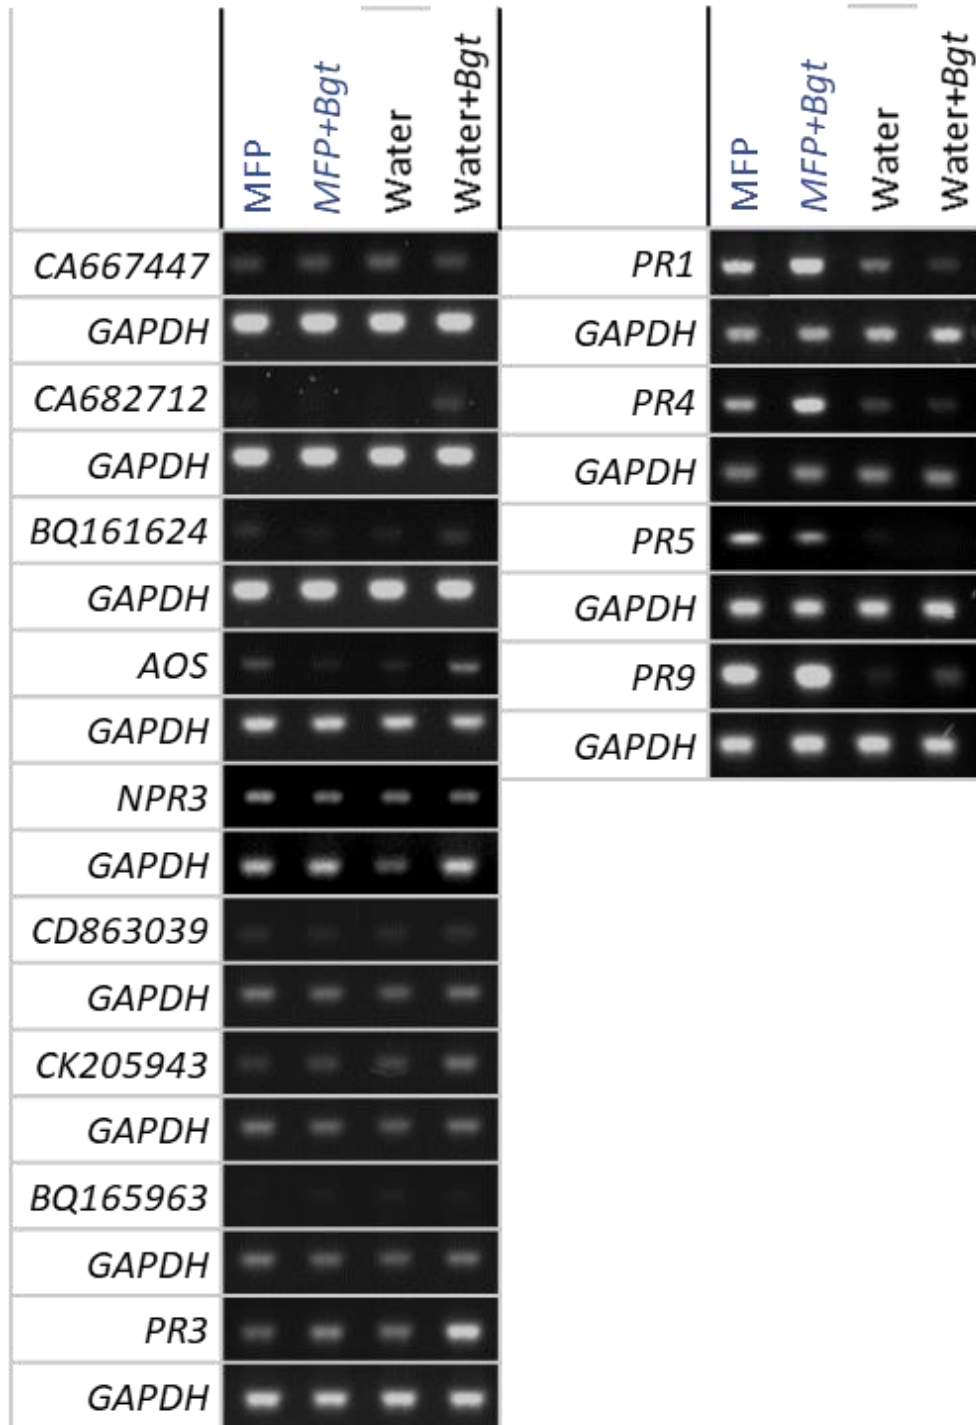

**Supplementary Fig 1. RT-PCR analysis of defence related gene expression in wheat leaf tissue.**

Leaves of three-week old wheat cv. Avatar seedlings were treated with MFP and immediately inoculated with *B. graminis* f. sp. *tritici* (Bgt). Transcripts of CA667447, CA682712, BQ161624, AOS, NPR3, CD863039, CK205943, BQ165963, PR3, PR1, PR4, PR5 and PR9 compared to the housekeeping gene GAPDH. Tissue was harvested at 24 hpi (two leaves from two plants pooled as a biological sample) for analysis. Results shown are representative of two independent experiments.
